# Supplementary material for: Reaction rebalancing: a novel approach to curating reaction databases
Source: Springer Nature journal article supplement (doi:10.1186/s13321-024-00875-4), 2024-07-19

### Original Reaction golden\_dataset\_38

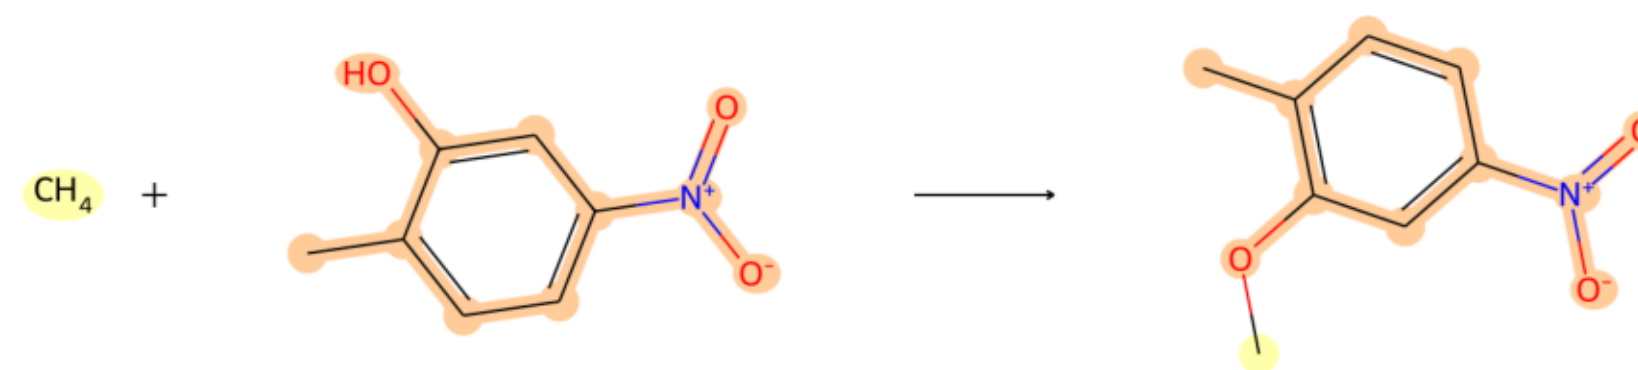

### Imputed Reaction golden\_dataset\_38

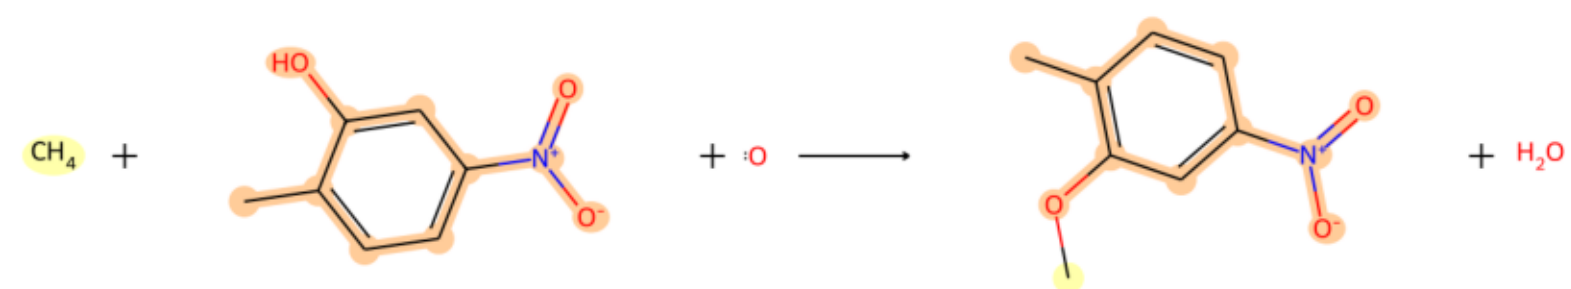

### Ground Truth golden\_dataset\_38

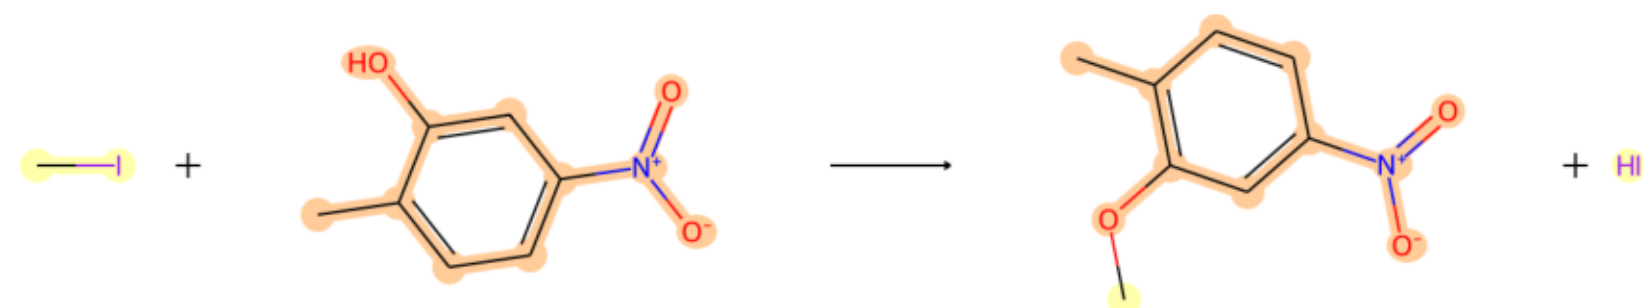

### Original Reaction golden\_dataset\_460

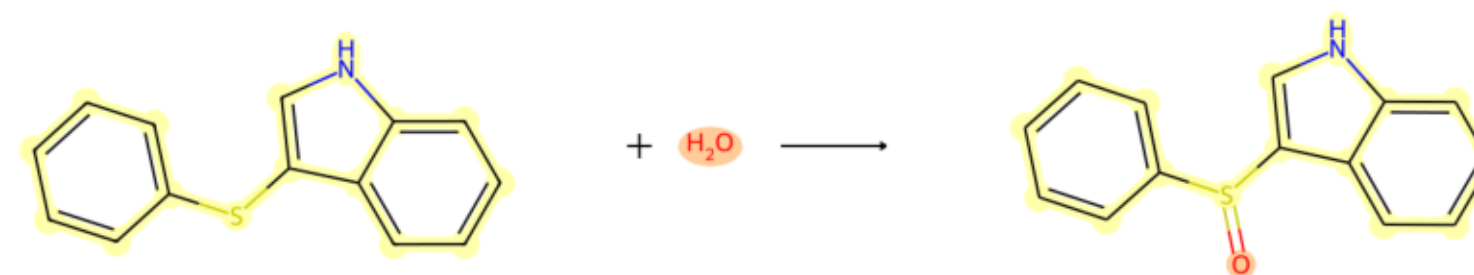

### Imputed Reaction golden\_dataset\_460

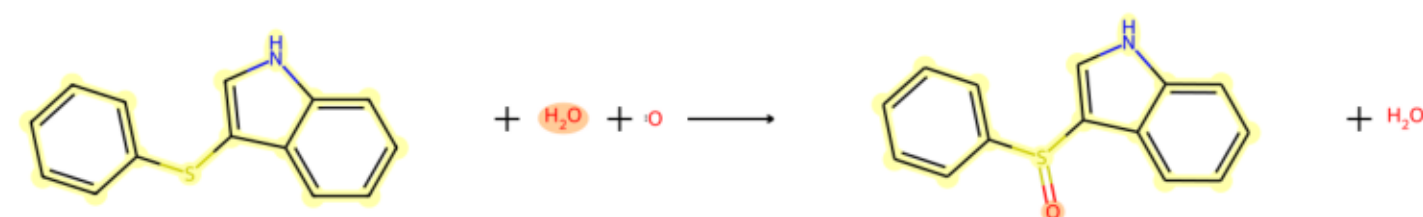

### Ground Truth golden\_dataset\_460

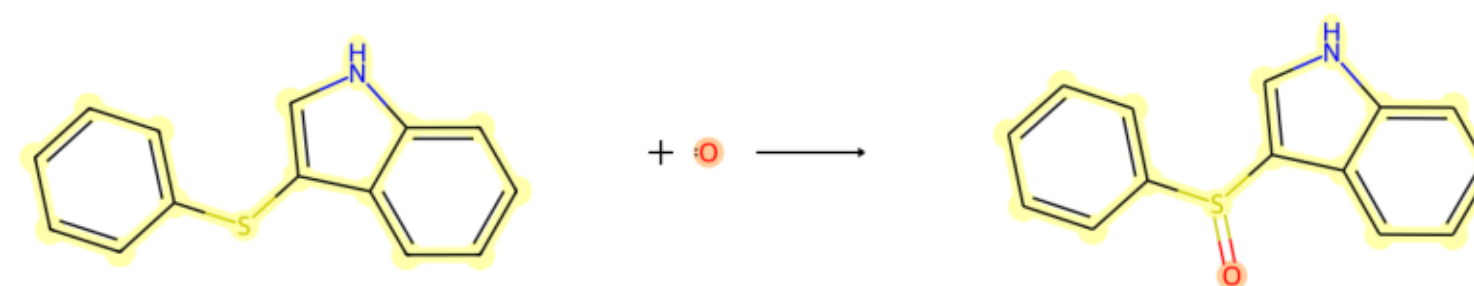

### Original Reaction golden\_dataset\_429

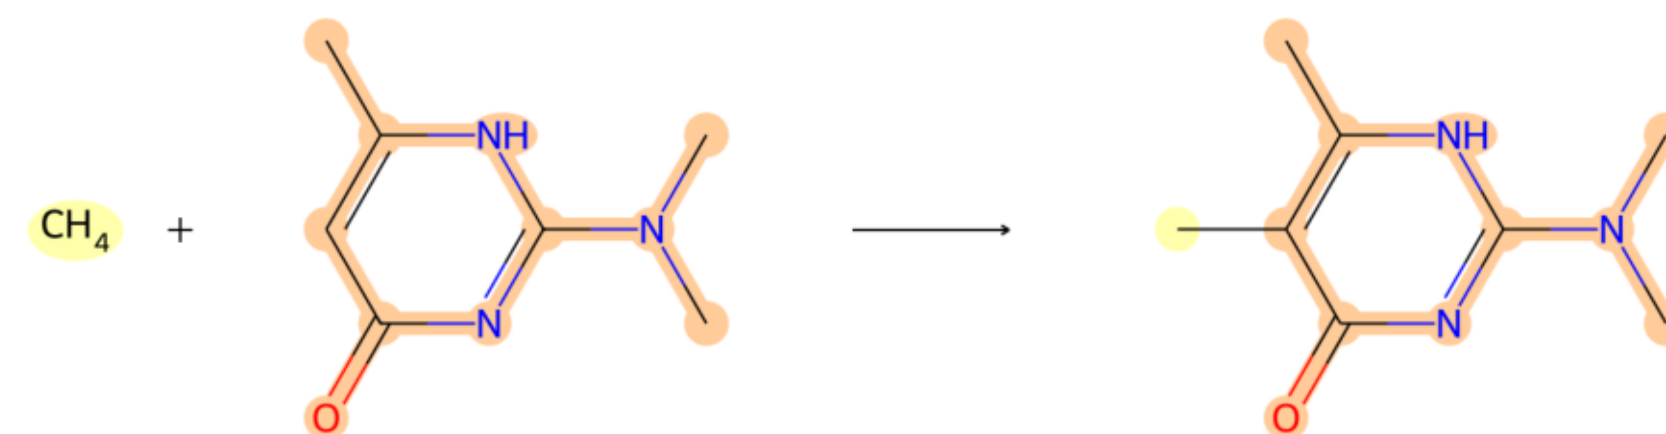

### Imputed Reaction golden\_dataset\_429

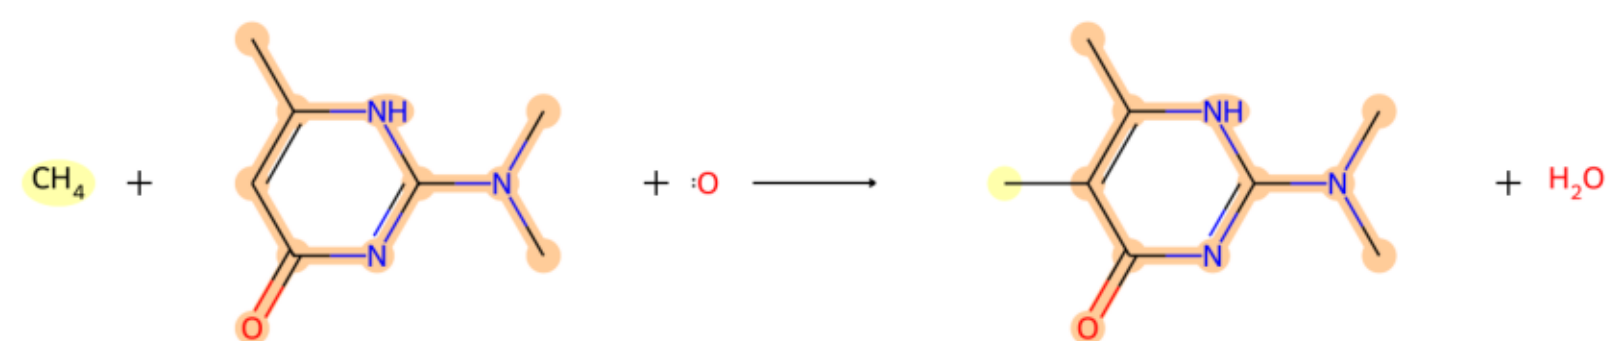

### Ground Truth golden\_dataset\_429

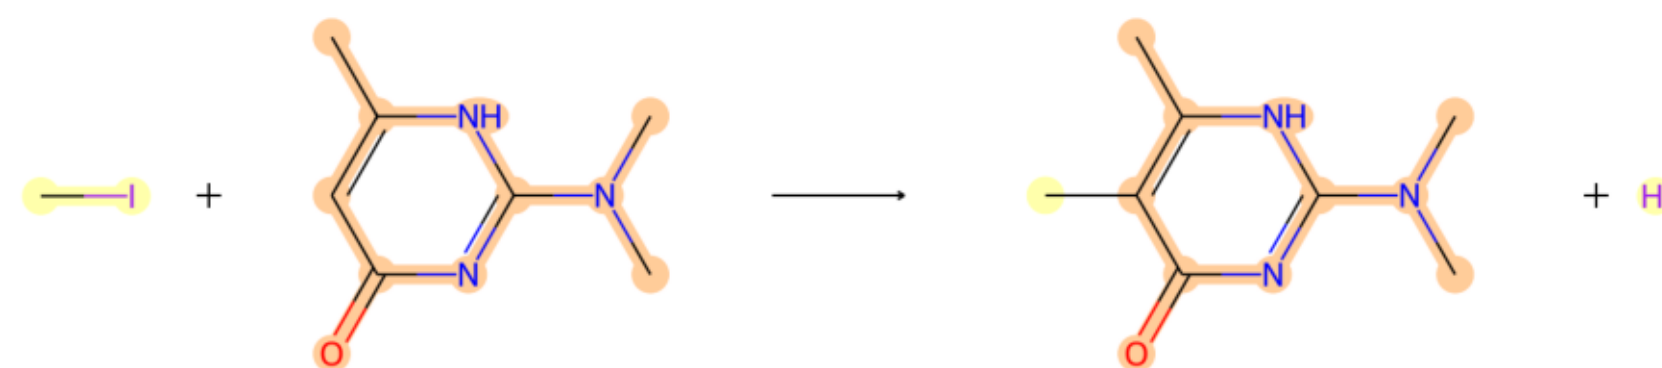

### Original Reaction golden\_dataset\_441

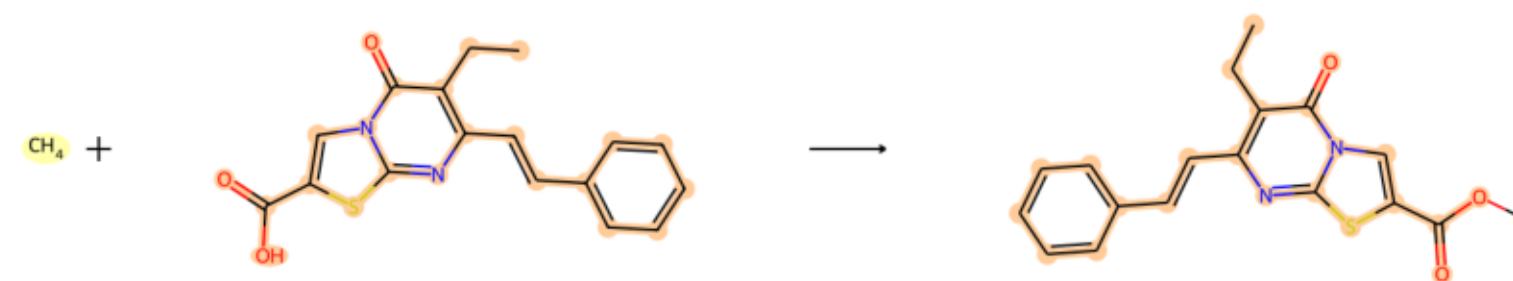

### Imputed Reaction golden\_dataset\_441

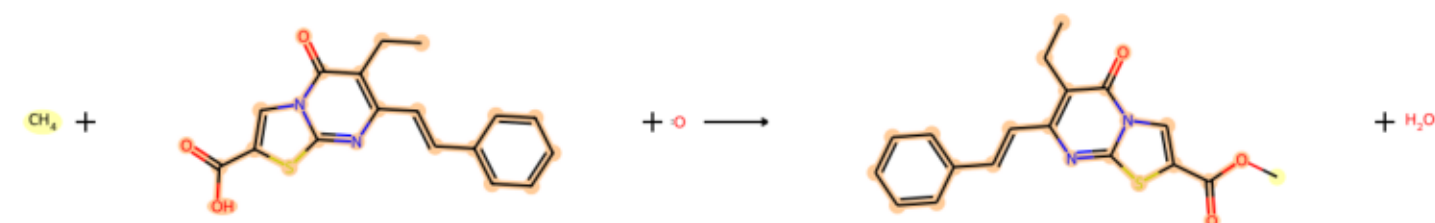

### Ground Truth golden\_dataset\_441

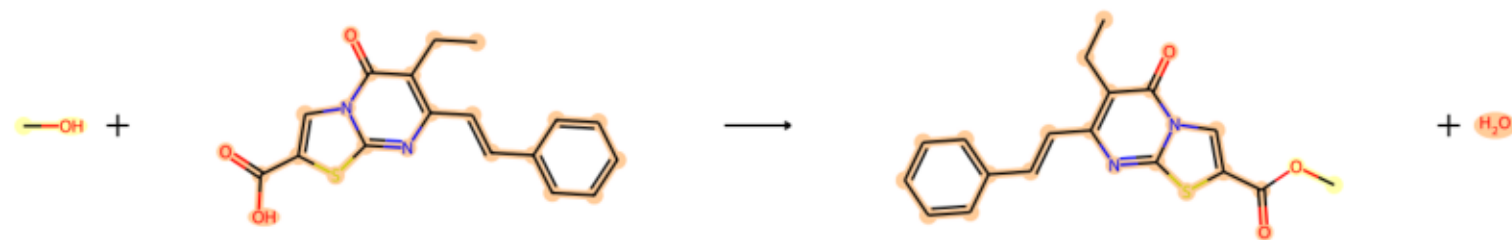

### Original Reaction golden\_dataset\_445

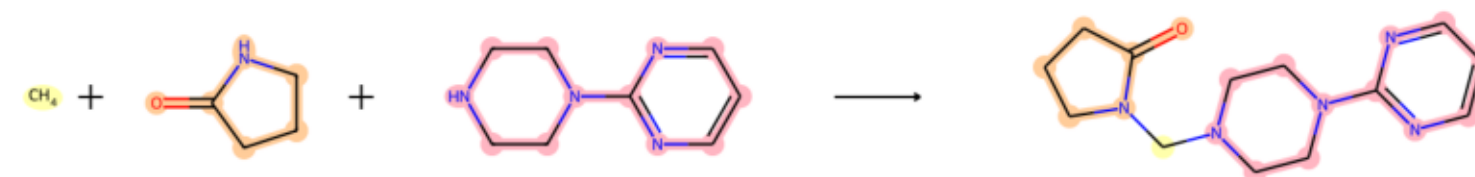

### Imputed Reaction golden\_dataset\_445

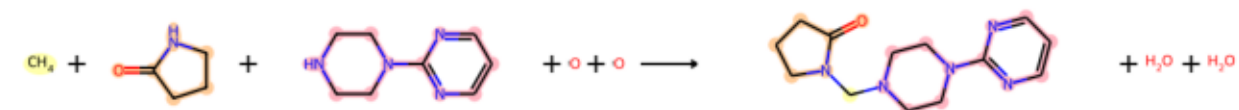

### Ground Truth golden\_dataset\_445

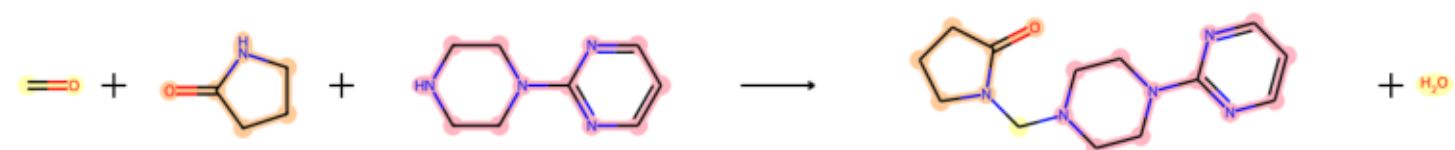

### Original Reaction golden\_dataset\_450

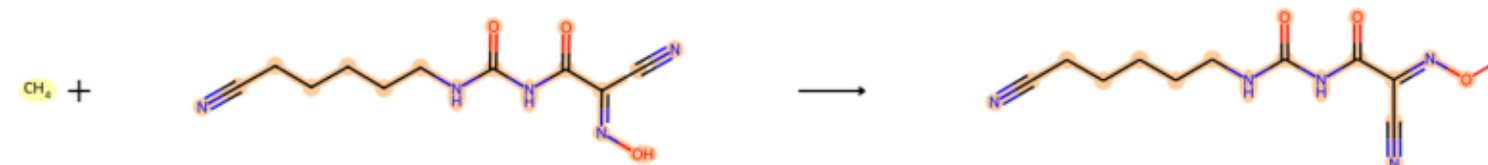

### Imputed Reaction golden\_dataset\_450

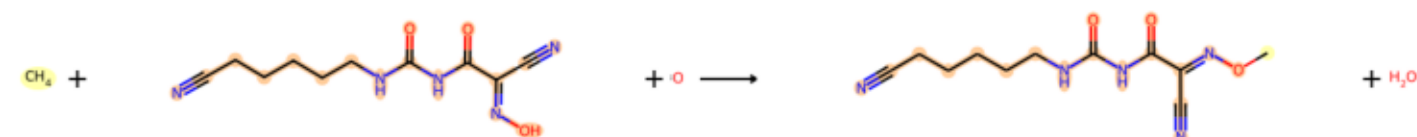

### Ground Truth golden\_dataset\_450

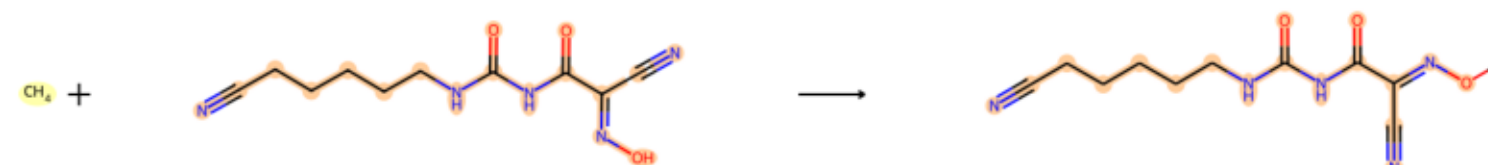

### Original Reaction golden\_dataset\_459

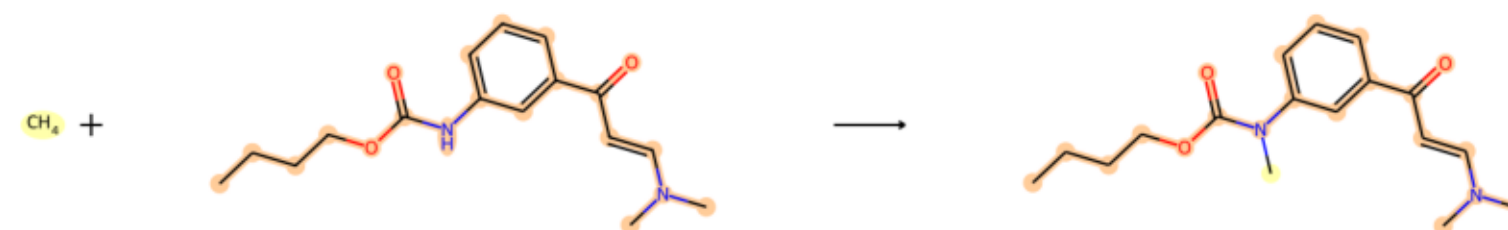

### Imputed Reaction golden\_dataset\_459

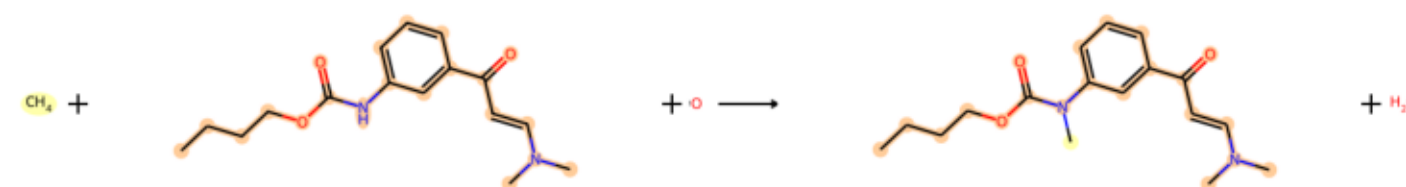

### Ground Truth golden\_dataset\_459

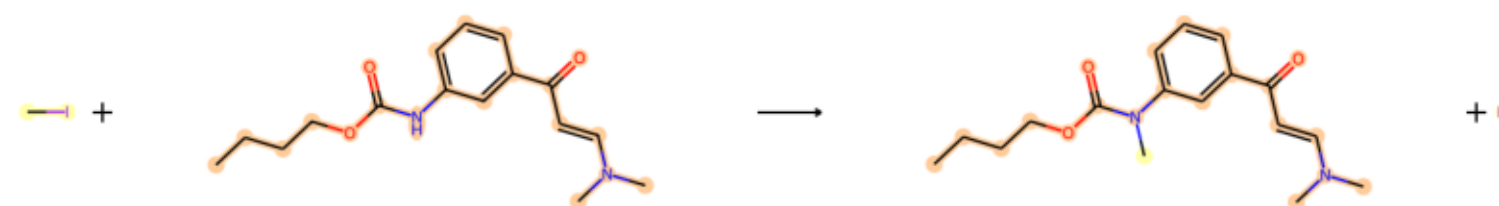

### Original Reaction golden\_dataset\_465

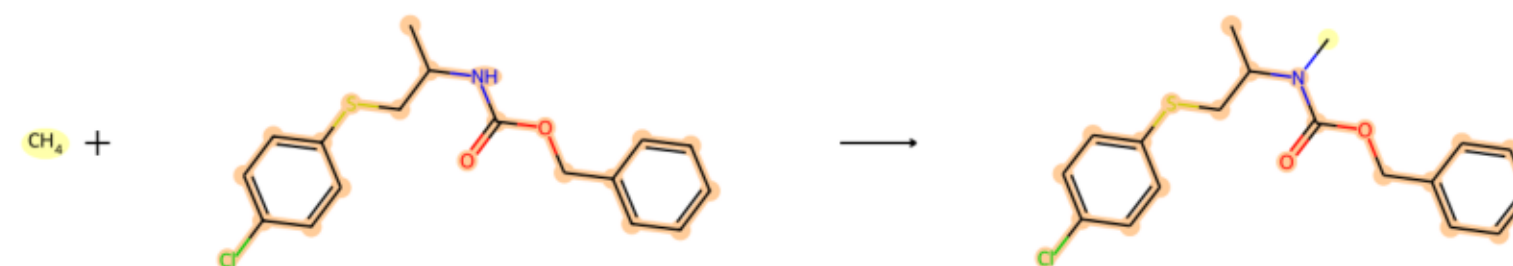

### Imputed Reaction golden\_dataset\_465

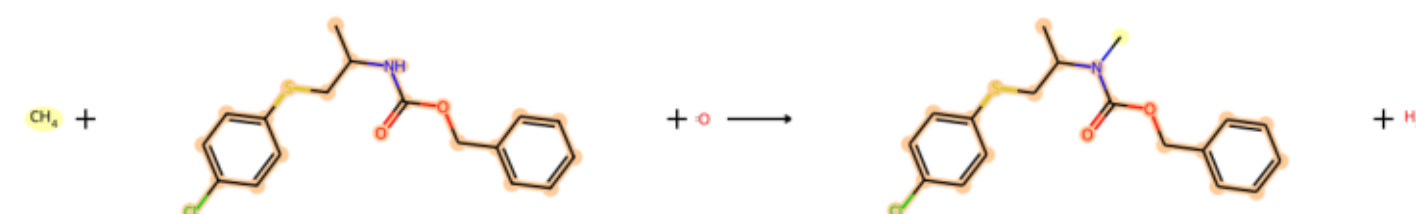

### Ground Truth golden\_dataset\_465

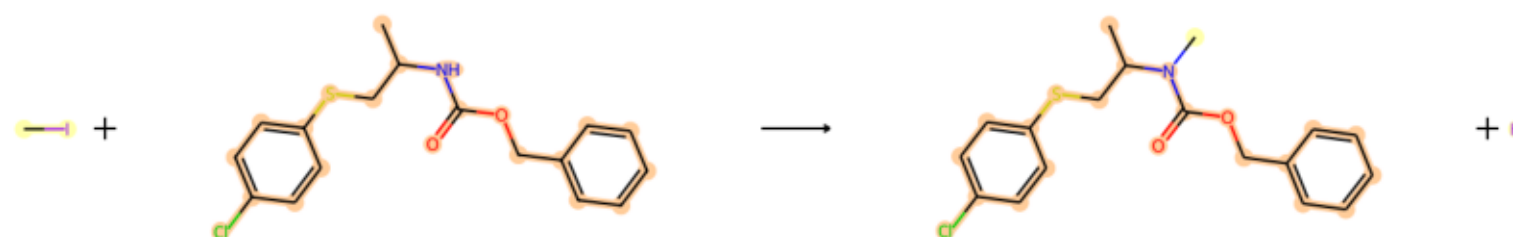



### Original Reaction golden\_dataset\_466

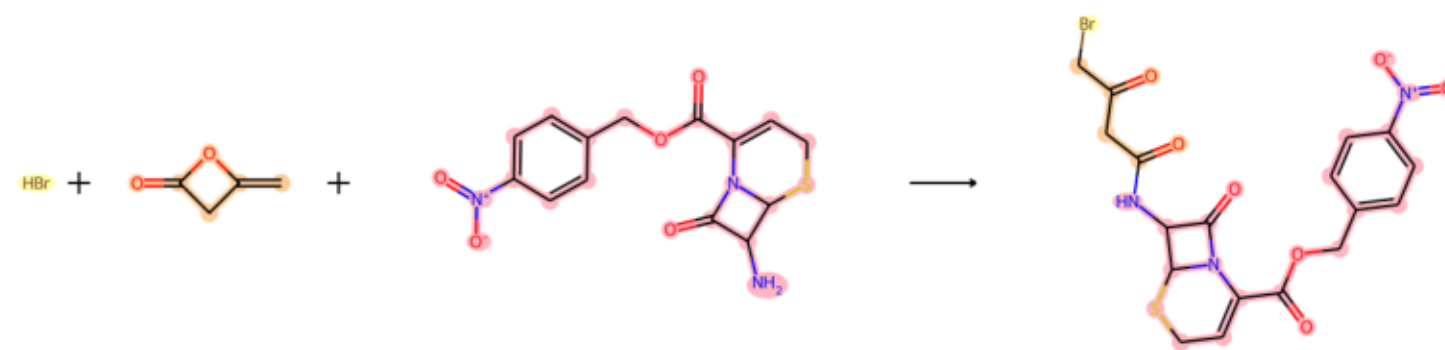

### Imputed Reaction golden\_dataset\_466

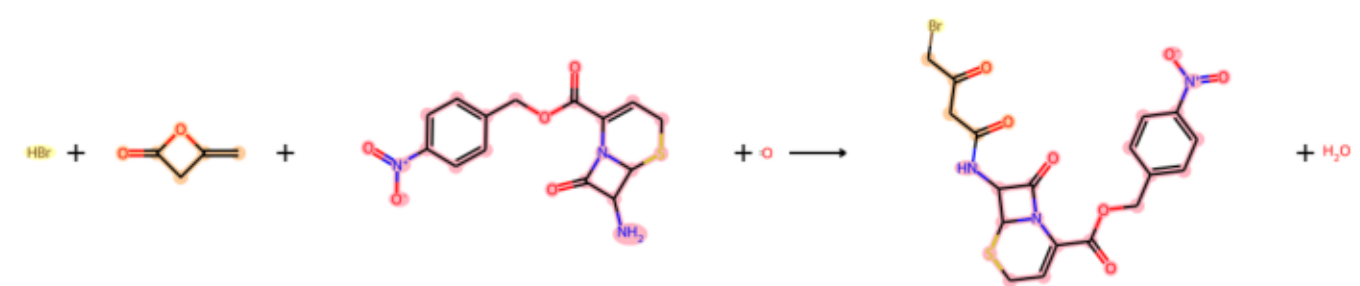

### Ground Truth golden\_dataset\_466

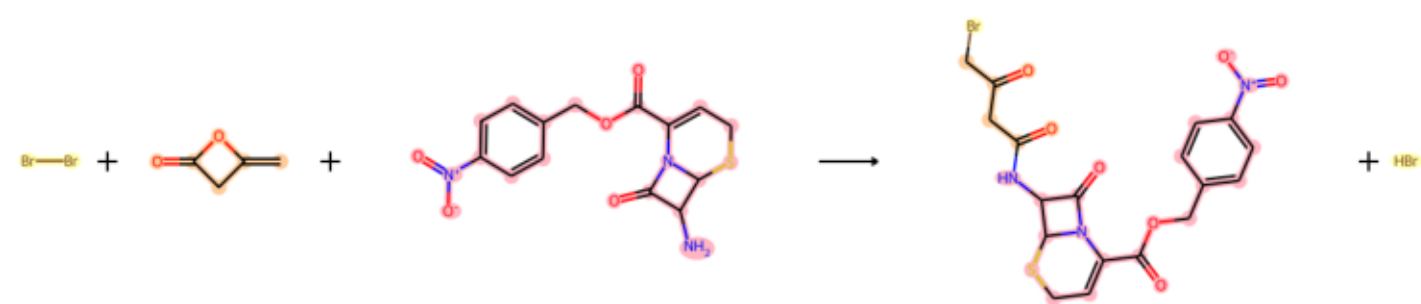

### Original Reaction golden\_dataset\_467

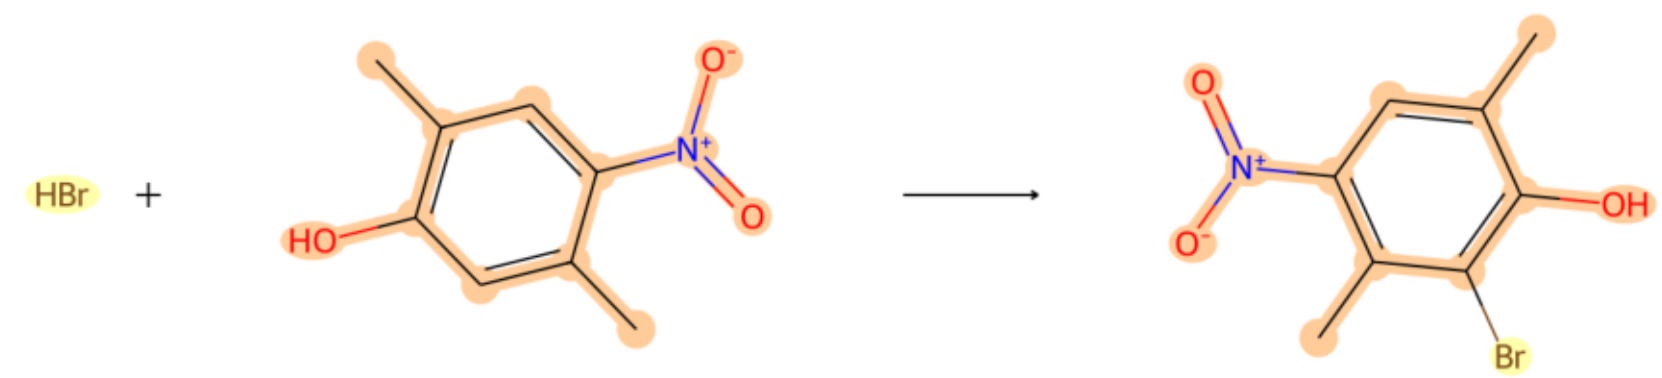

### Imputed Reaction golden\_dataset\_467

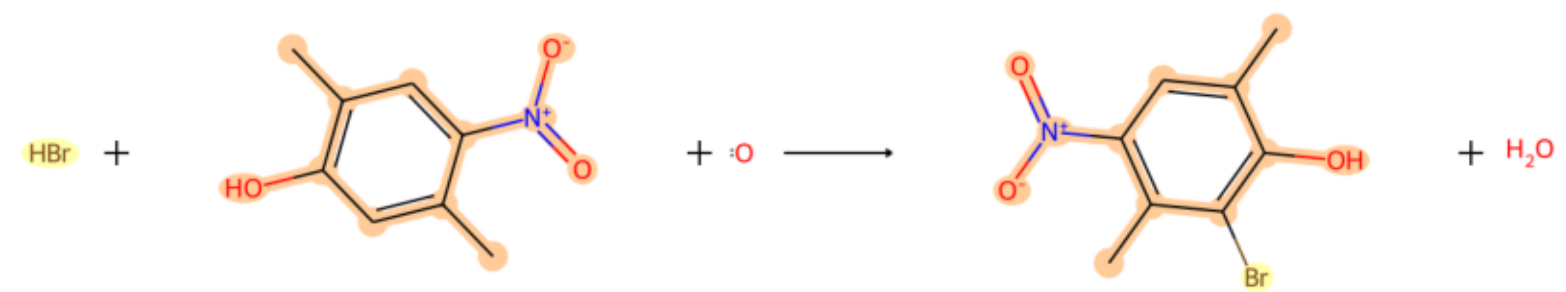

### Ground Truth golden\_dataset\_467

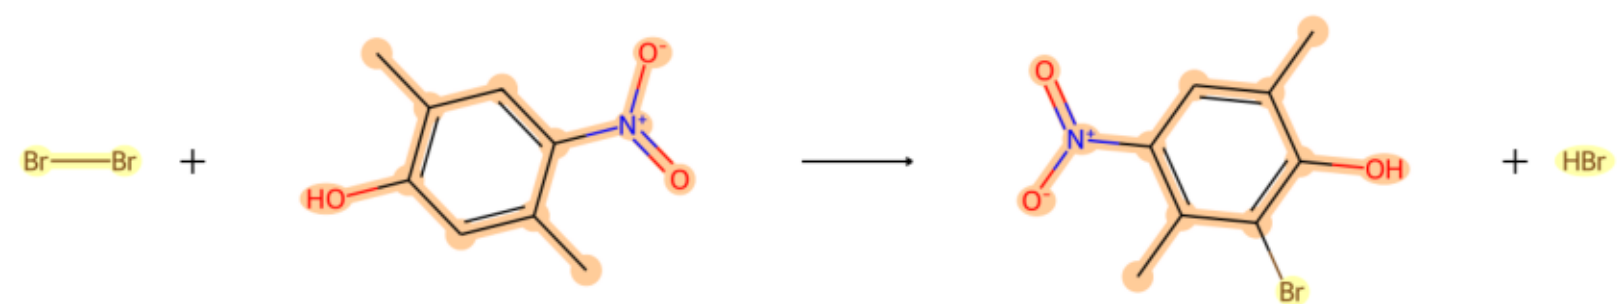

### Original Reaction golden\_dataset\_468

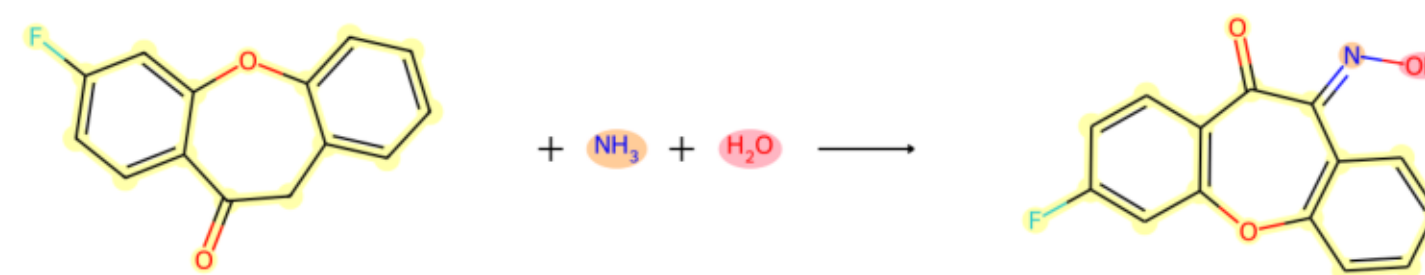

### Imputed Reaction golden\_dataset\_468

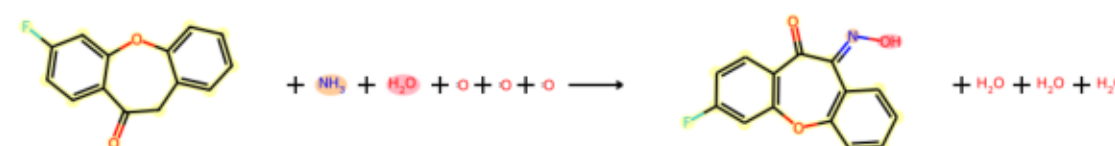

### Ground Truth golden\_dataset\_468

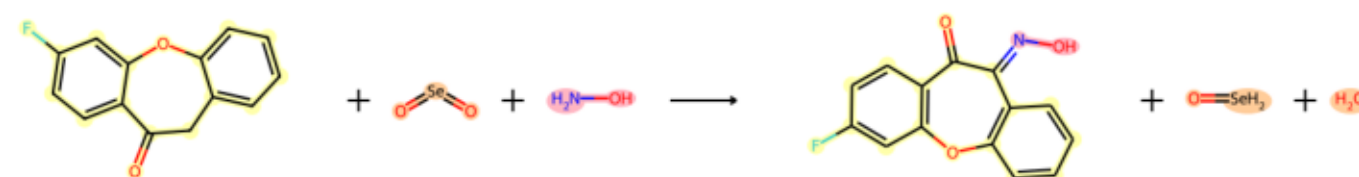

### Original Reaction golden\_dataset\_475

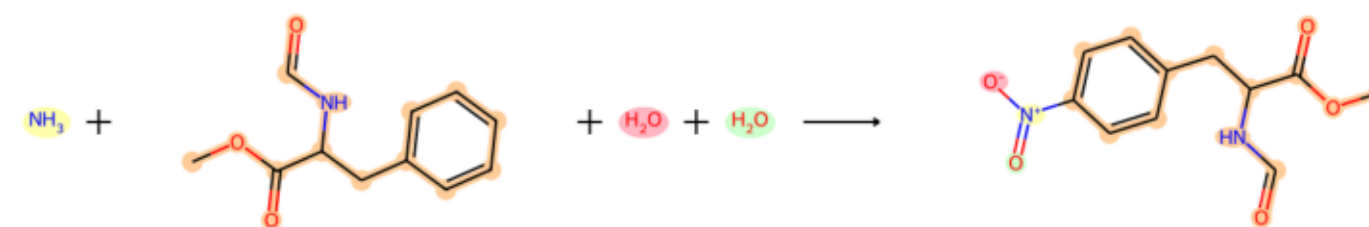

### Imputed Reaction golden\_dataset\_475

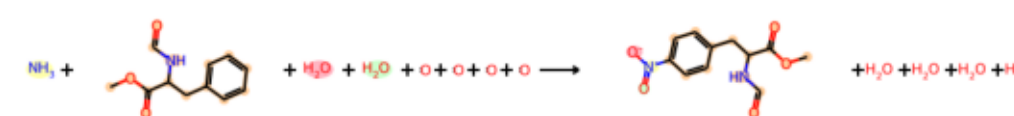

### Ground Truth golden\_dataset\_475

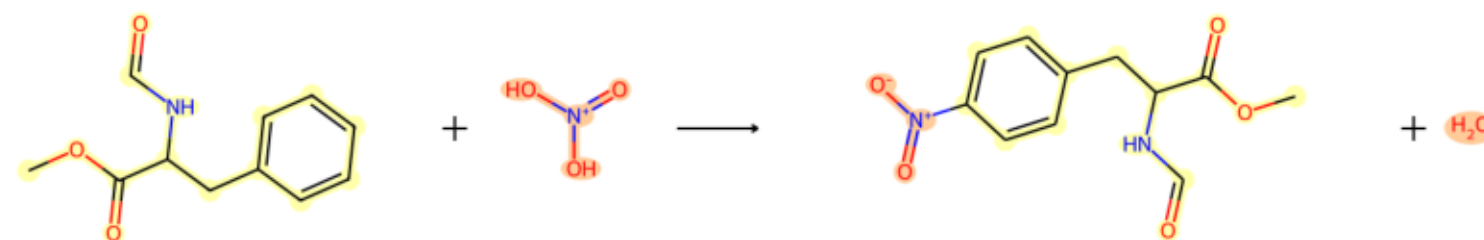

### Original Reaction golden\_dataset\_517

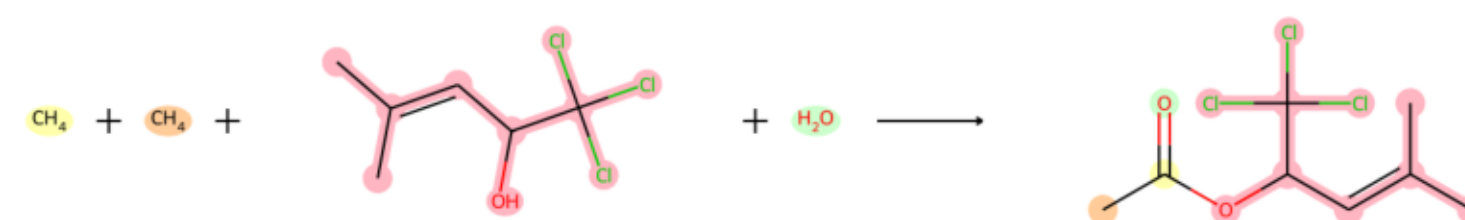

### Imputed Reaction golden\_dataset\_517

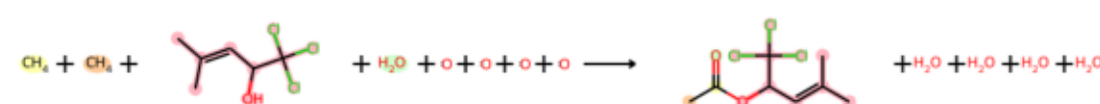

### Ground Truth golden\_dataset\_517

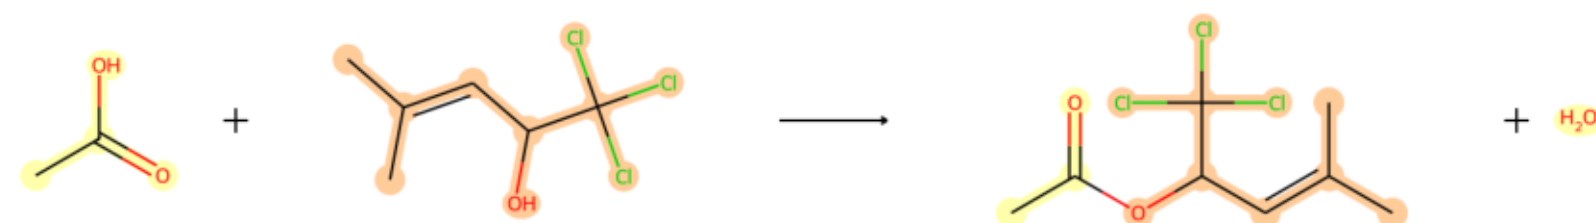

### Original Reaction golden\_dataset\_521

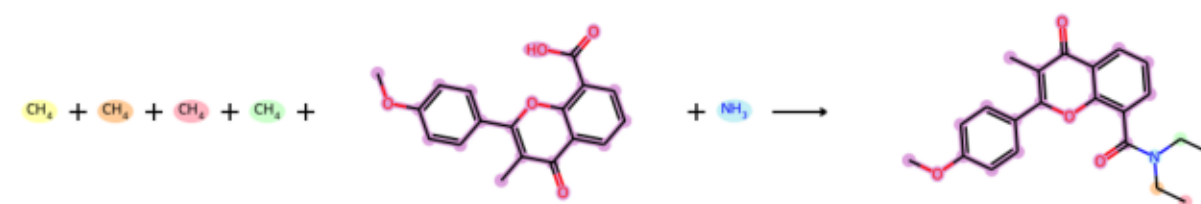

### Imputed Reaction golden\_dataset\_521

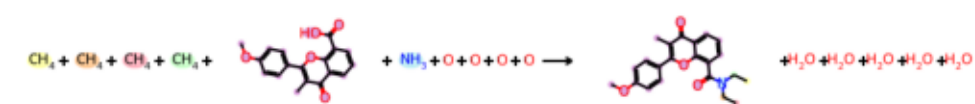

### Ground Truth golden\_dataset\_521

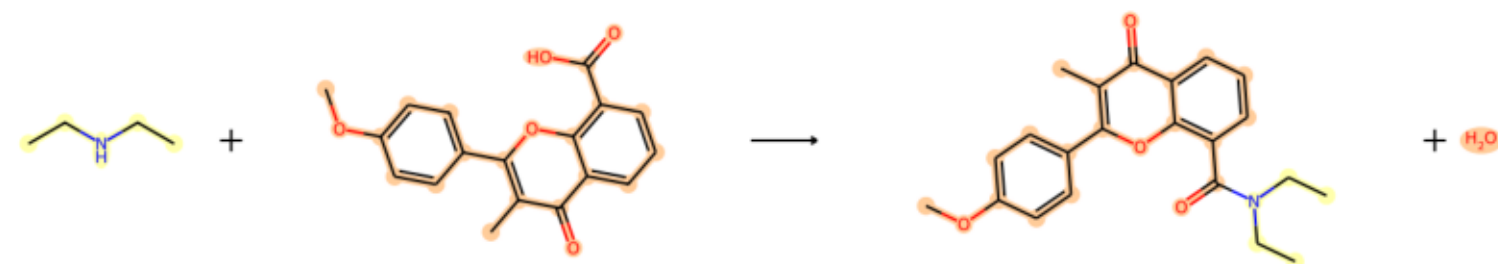

### Original Reaction golden\_dataset\_549

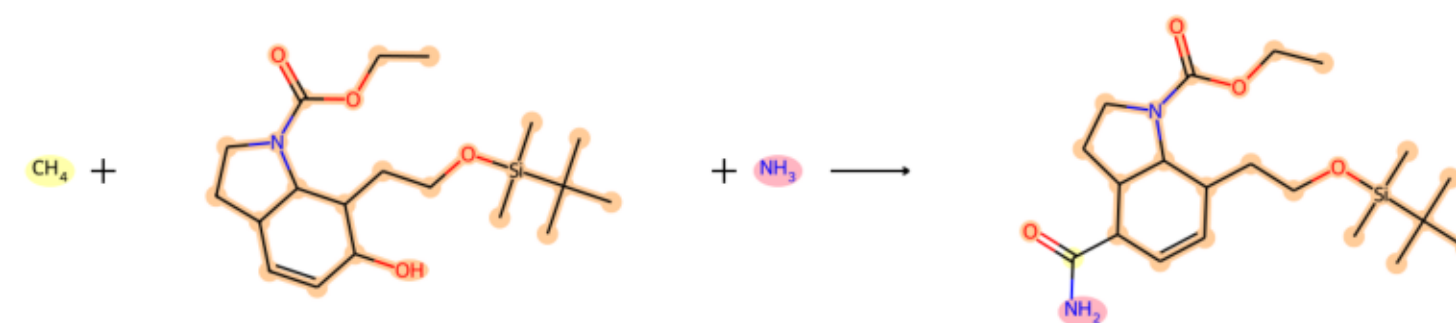

### Imputed Reaction golden\_dataset\_549

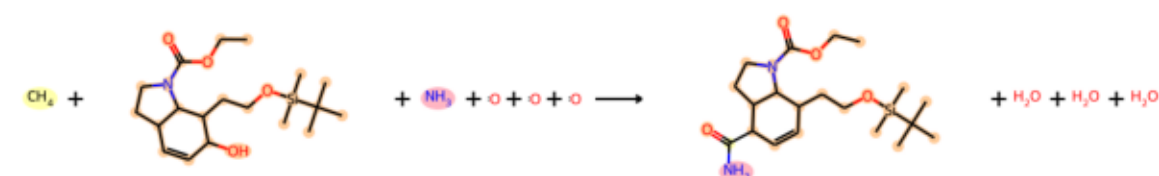

### Ground Truth golden\_dataset\_549

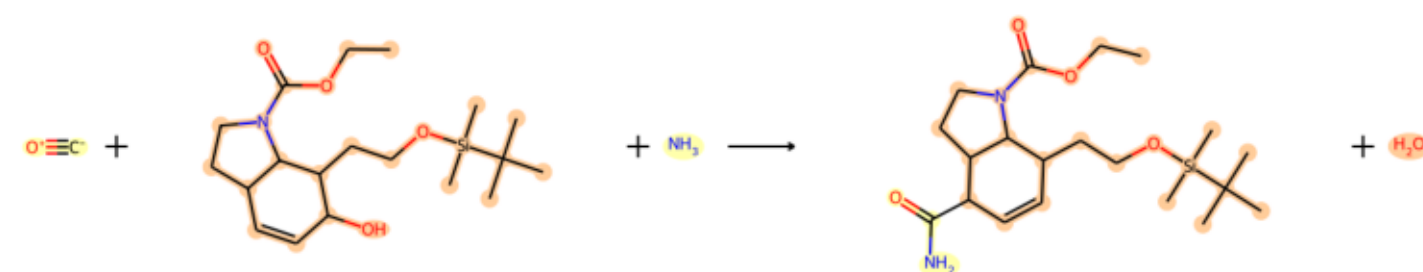

### Original Reaction golden\_dataset\_730

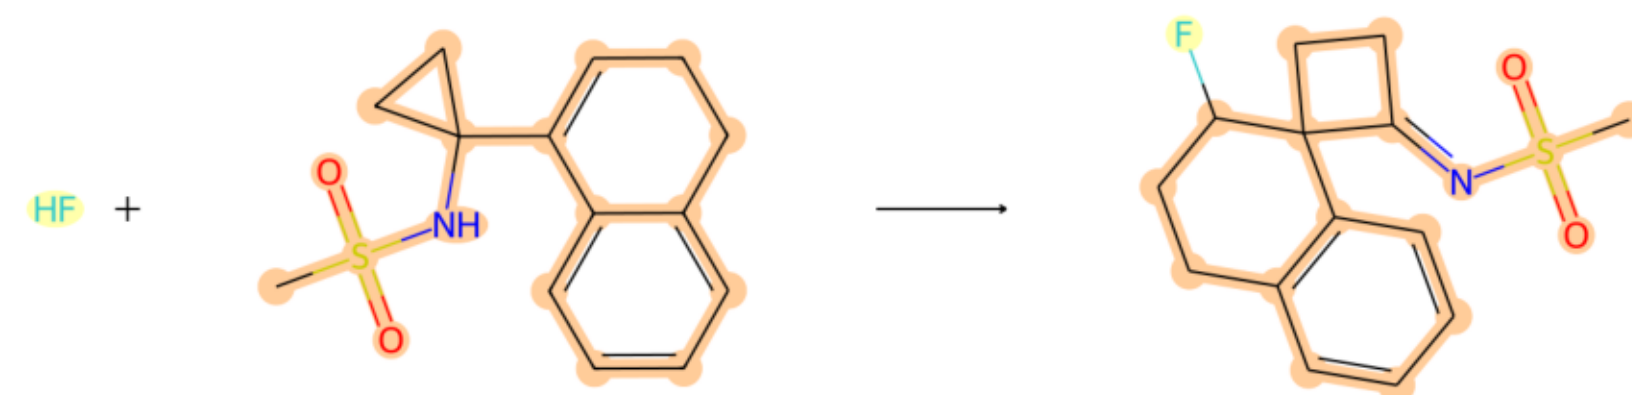

### Imputed Reaction golden\_dataset\_730

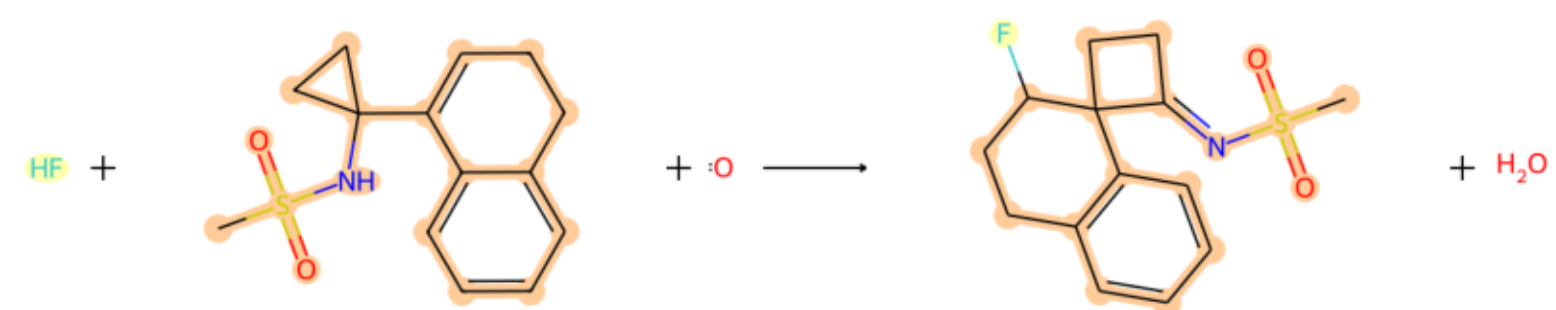

### Ground Truth golden\_dataset\_730

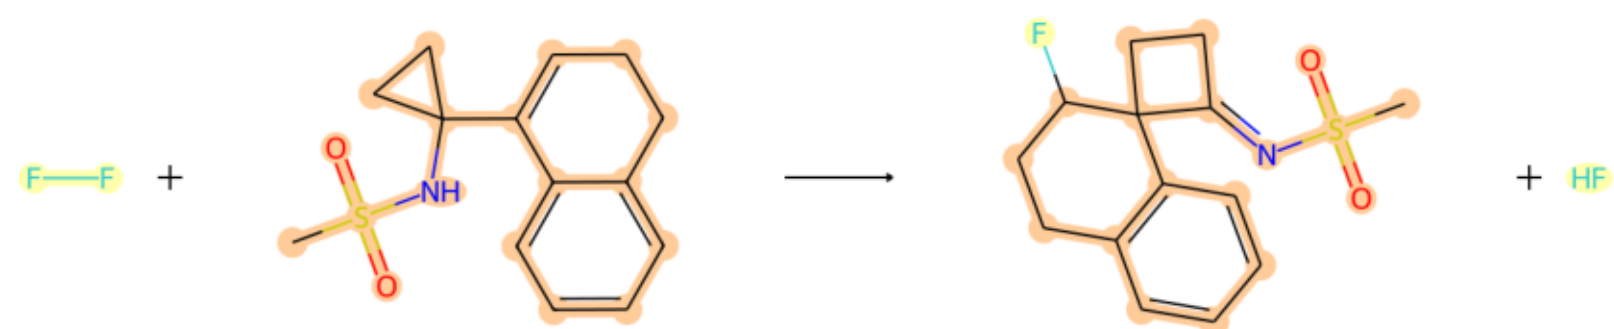



### Original Reaction golden\_dataset\_752

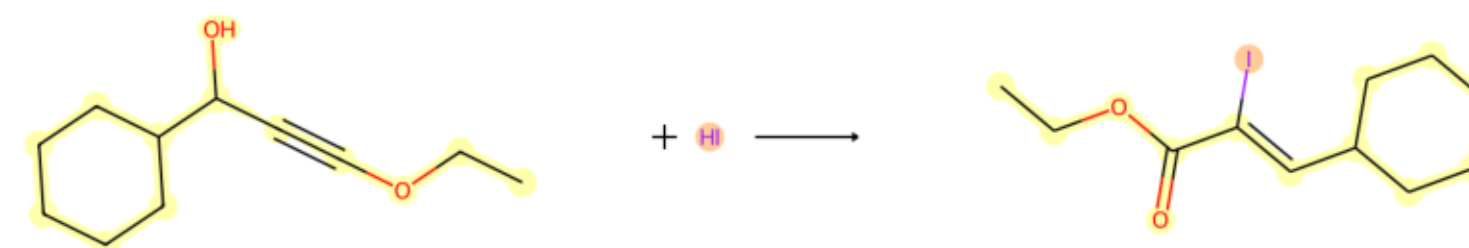

### Imputed Reaction golden\_dataset\_752

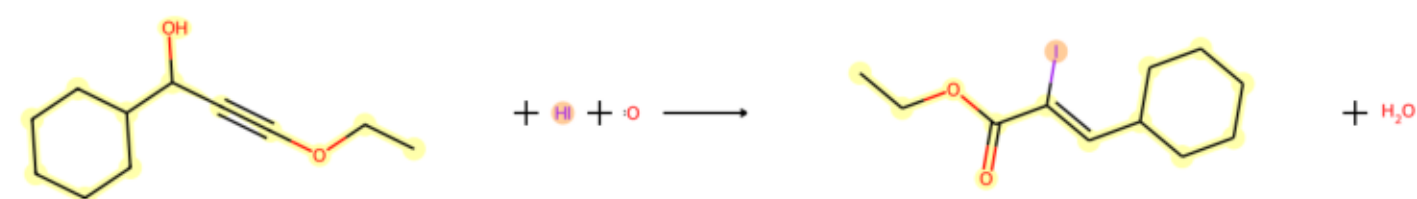

### Ground Truth golden\_dataset\_752

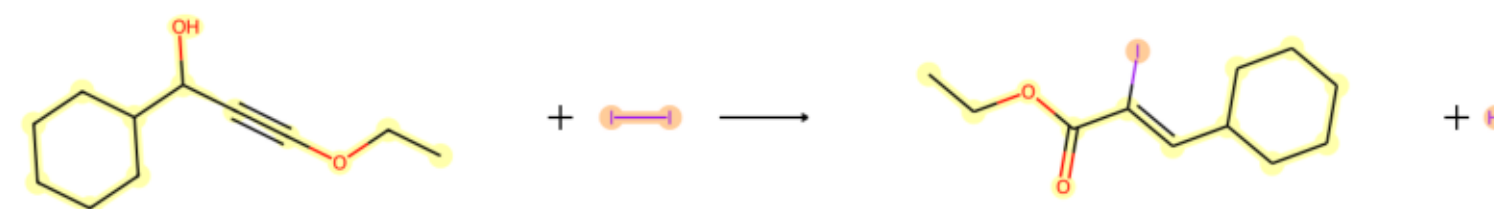

### Original Reaction golden\_dataset\_754

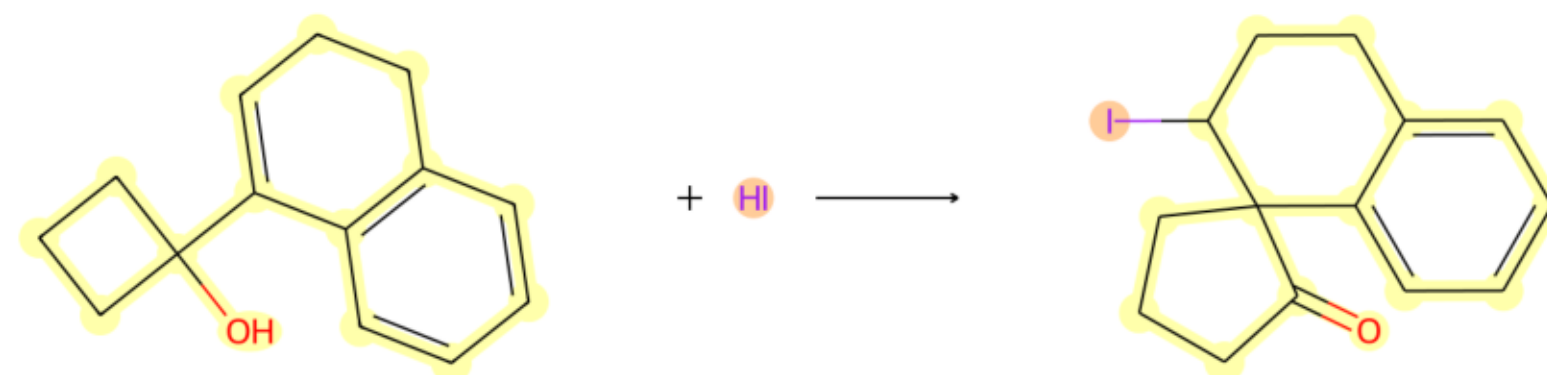

### Imputed Reaction golden\_dataset\_754

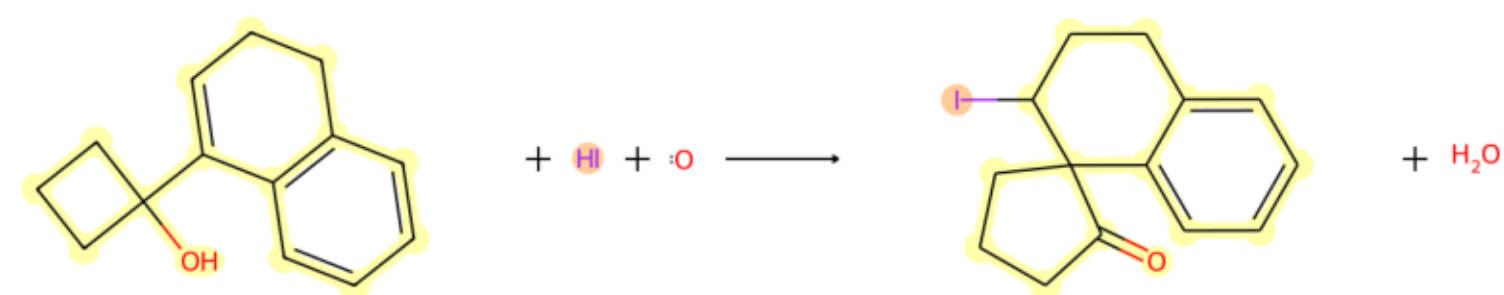

### Ground Truth golden\_dataset\_754

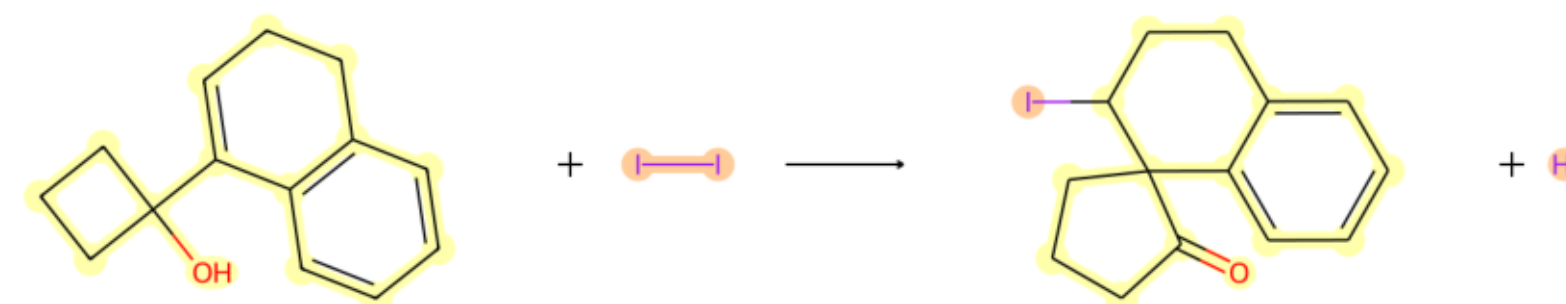

### Original Reaction golden\_dataset\_913

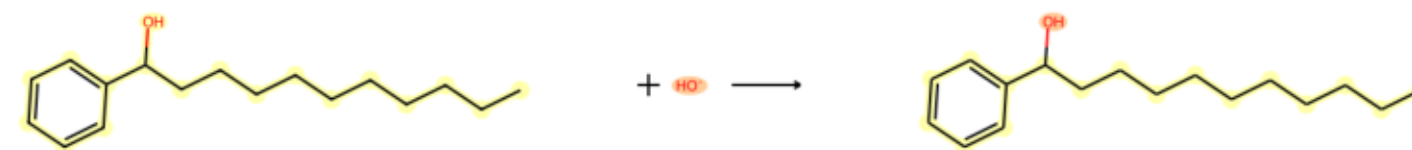

### Imputed Reaction golden\_dataset\_913

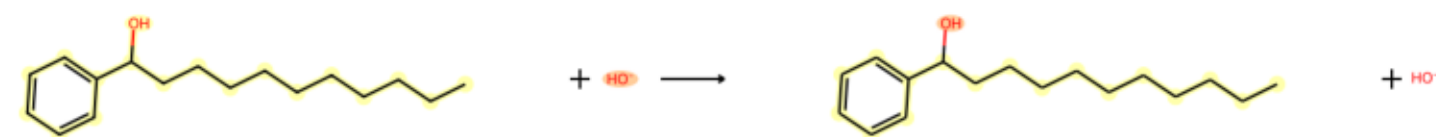

### Ground Truth golden\_dataset\_913

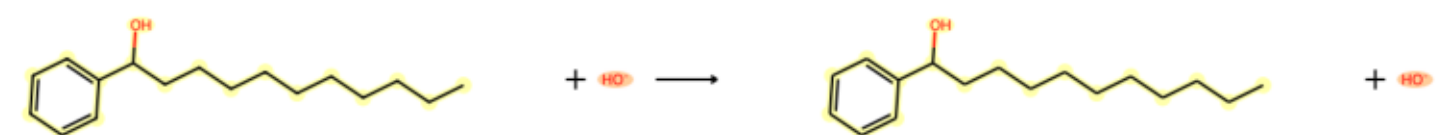

### Original Reaction golden\_dataset\_936

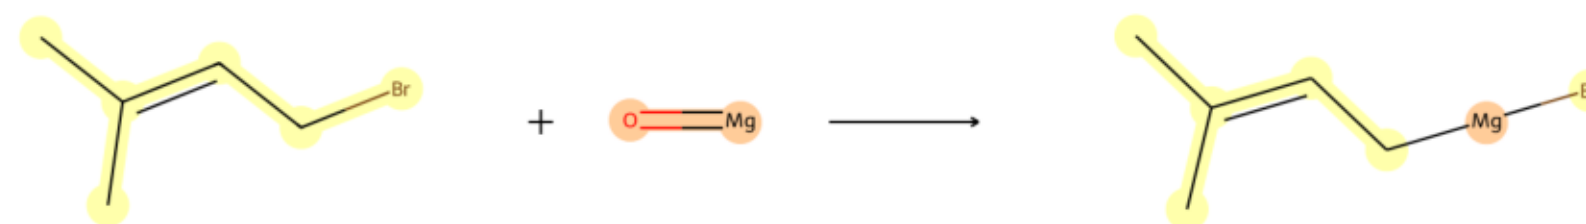

### Imputed Reaction golden\_dataset\_936

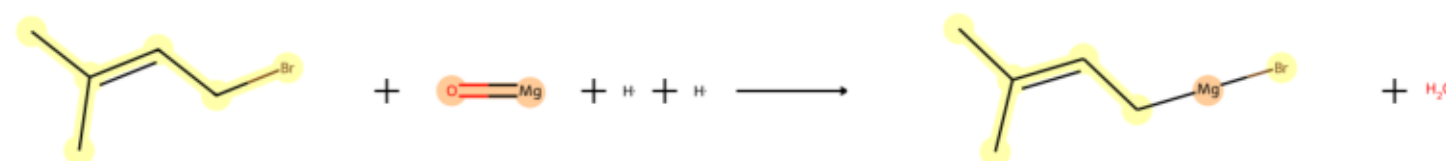

### Ground Truth golden\_dataset\_936

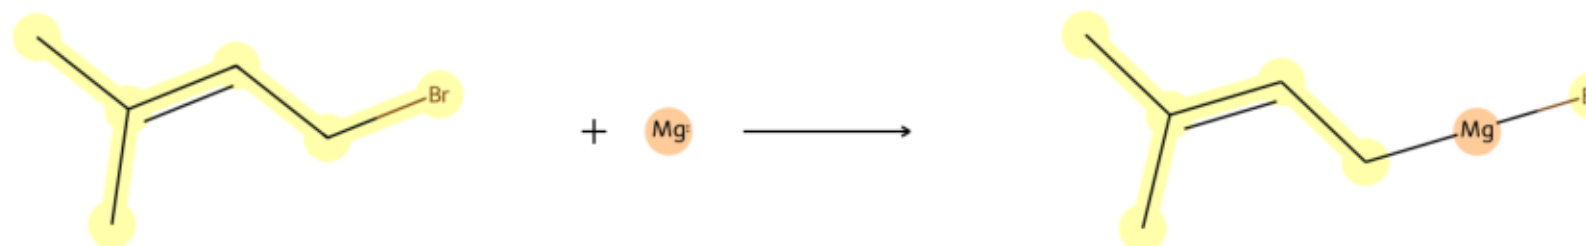

### Original Reaction golden\_dataset\_1004

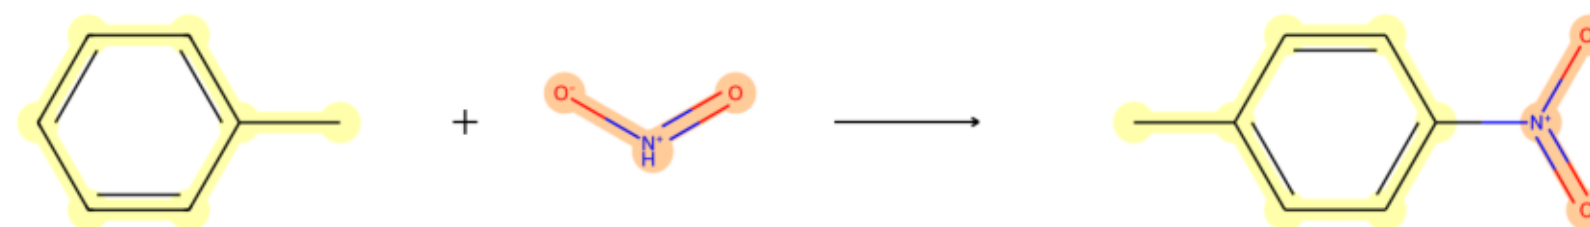

### Imputed Reaction golden\_dataset\_1004

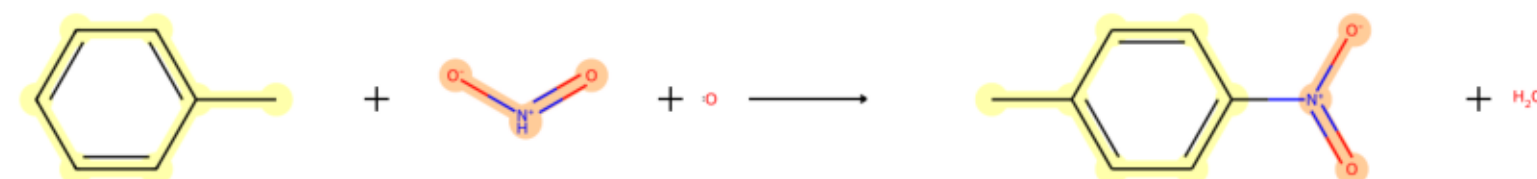

### Ground Truth golden\_dataset\_1004

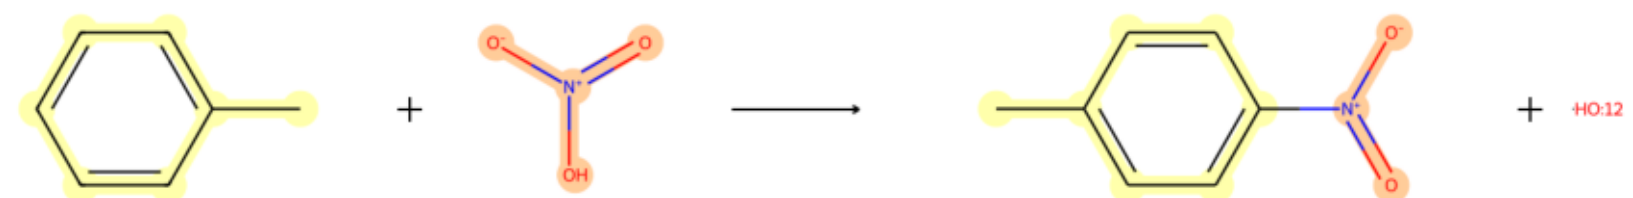

### Original Reaction golden\_dataset\_1443

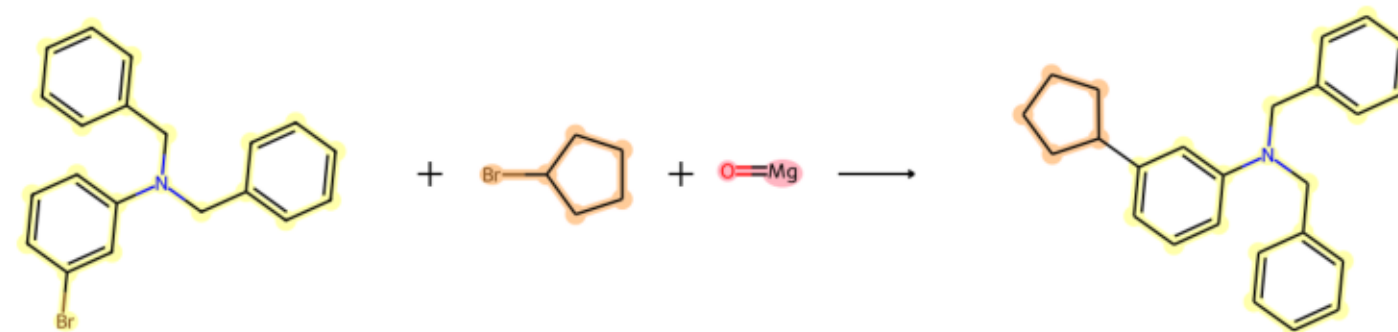

### Imputed Reaction golden\_dataset\_1443

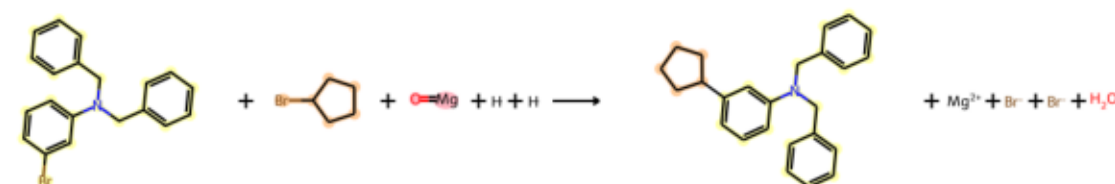

### Ground Truth golden\_dataset\_1443

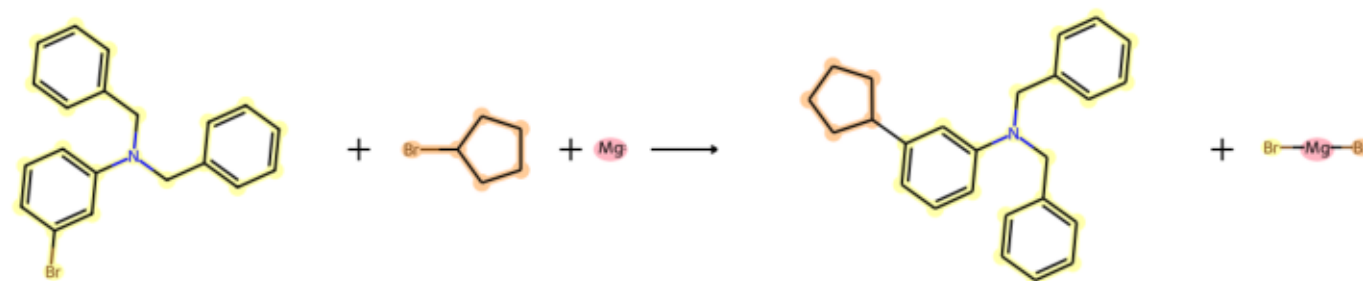

Supplement: 13321_2024_875_MOESM2_ESM.pdf [file 13321_2024_875_MOESM2_ESM.pdf]
